# Supplementary material
Source: PubMed Central journal article supplement (PMC6483079)
Supplement: NIHMS1019166-supplement-Supplemental_Figure.pdf [file NIHMS1019166-supplement-Supplemental_Figure.pdf]

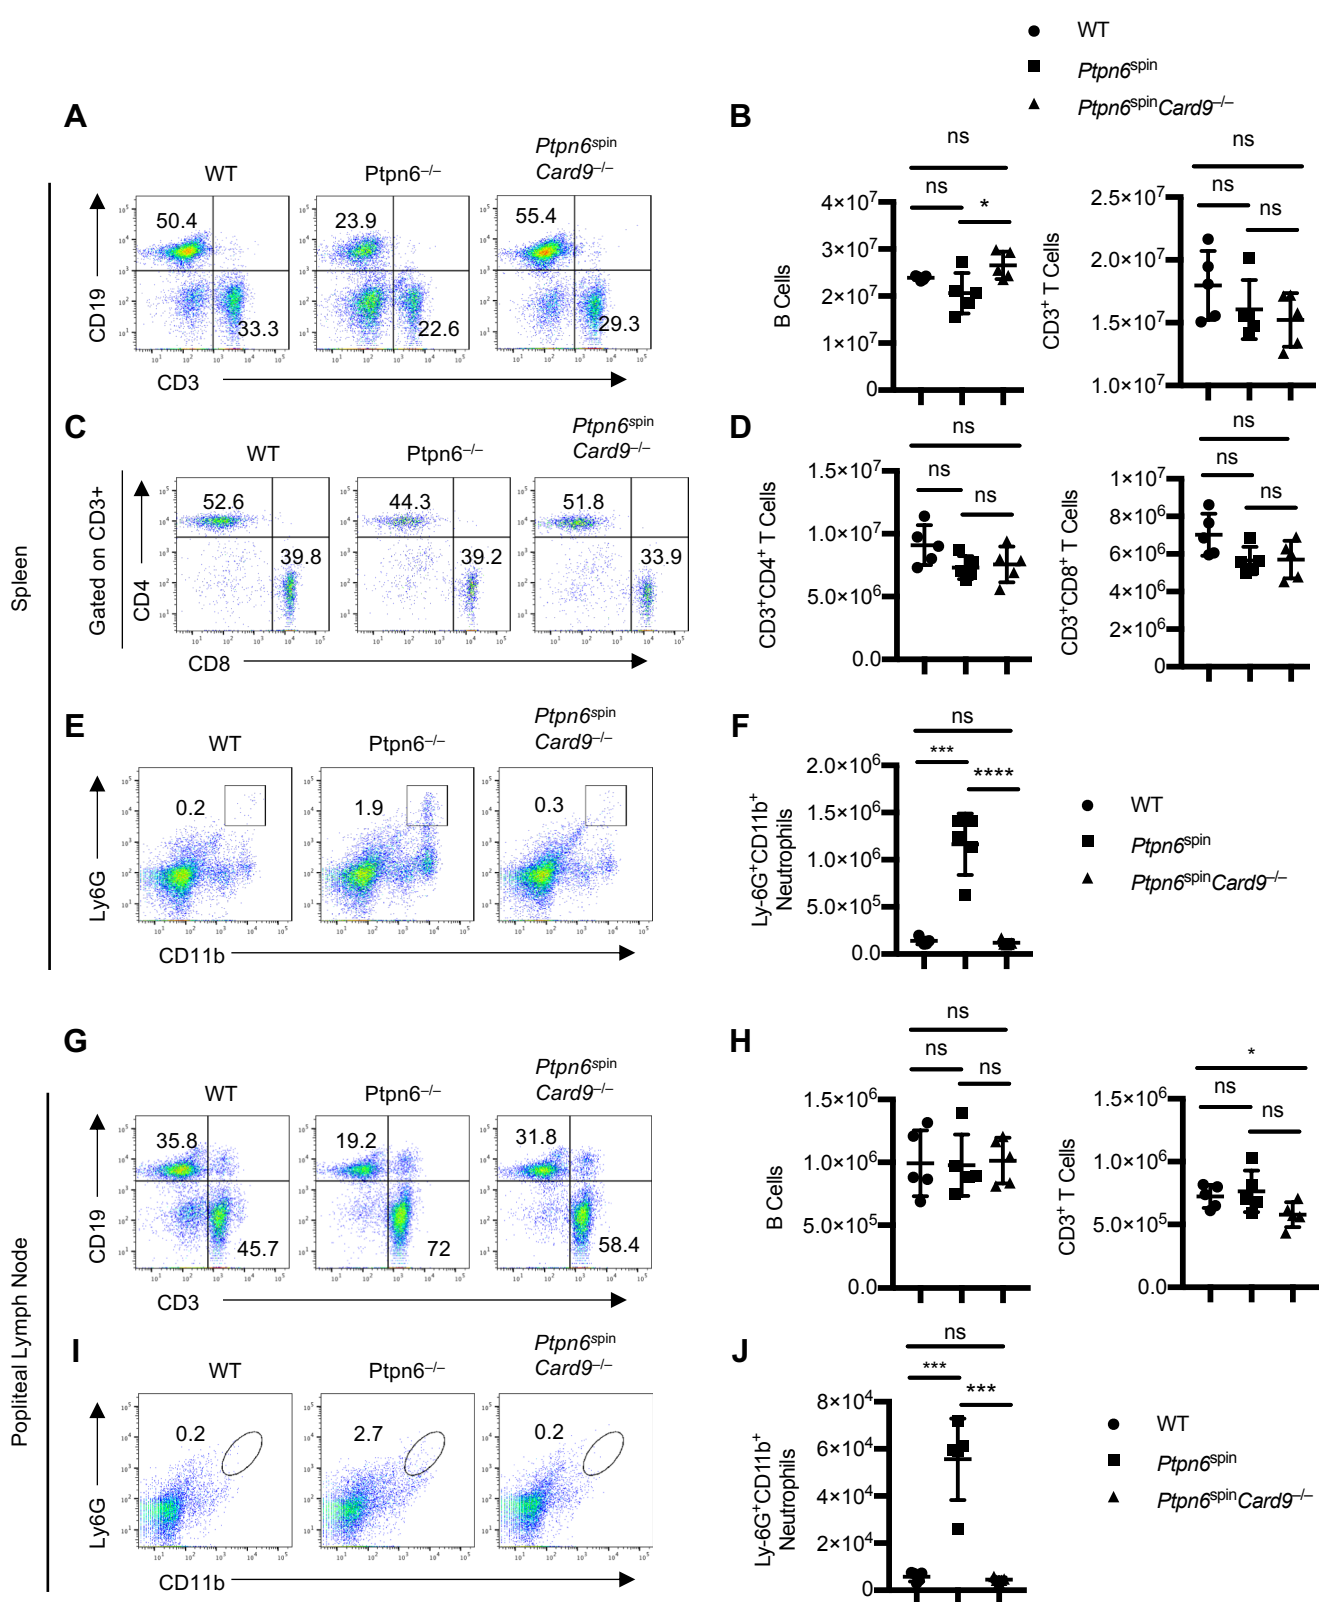

**Supplemental Figure 1. Flow cytometry analysis of *Ptpn6<sup>spin</sup>Card9<sup>-/-</sup>* mice.**

(A-F) Spleen and (G-J) popliteal lymph nodes were harvested and flow cytometry analysis were performed for immune cell population of WT, *Ptpn6<sup>spin</sup>* and *Ptpn6<sup>spin</sup>Card9<sup>-/-</sup>* mice. Each point represents an individual mouse, and the line represents Mean ± SEM. Two-way ANOVA was used to determine the significance between the two groups analyzed. ns not significant, \*\* $p < 0.01$ , \*\*\* $p < 0.001$ , \*\*\*\* $p < 0.0001$ .
